**Direct and High-Throughput Assays for Human Cell Killing through Trogocytosis  
by *Entamoeba histolytica***

**Akhila Bettadapur and Katherine S. Ralston**

**Department of Microbiology and Molecular Genetics, University of  
California, Davis.**

**Please address all correspondence to:  
Katherine S. Ralston, Ph.D.  
Department of Microbiology and Molecular Genetics  
University of California, Davis  
1 Shields Avenue  
Davis, CA 95616 USA  
Tel: +1 (530) 752-5429  
Fax: +1 (530) 752-9014  
E-mail: [ksralston@ucdavis.edu](mailto:ksralston@ucdavis.edu)**

1 **Abstract**

2 *Entamoeba histolytica* is a microbial eukaryote and causative agent of the diarrheal  
3 disease amoebiasis. Pathogenesis is associated with profound damage to human tissues, and  
4 treatment options are limited. We discovered that amoebae attack and kill human cells through a  
5 cell-nibbling process that we named trogocytosis (*trogo-*: nibble). Trogocytosis is likely to  
6 underlie tissue damage during infection and it represents a potential target for therapeutic  
7 intervention, although the mechanism is still unknown. Assays in current use to analyze  
8 trogocytosis by amoebae have not been amenable to studying different types of human cells, or  
9 to high-throughput analysis. Here, we developed two complementary assays to measure  
10 trogocytosis by quantifying human cell viability, both of which can be used for suspension and  
11 adherent cells. The first assay uses CellTiterGlo, a luminescent readout for cellular ATP levels,  
12 as a proxy for cell viability. We found that the CellTiterGlo signal is proportional to the quantity  
13 of viable cells, and can be used to detect death of human cells after co-incubation with amoebae.  
14 We established a second assay that is microscopy-based and uses two fluorescent stains to  
15 directly differentiate live and dead human cells. Both assays are simple and inexpensive, can be  
16 used with suspension and adherent human cell types, and are amenable to high-throughput  
17 approaches. These new assays are tools to improve understanding of amoebiasis pathogenesis.

## 18 ***1. Introduction***

19 *Entamoeba histolytica* is the causative agent of amoebiasis. During infection, the actively  
20 replicating trophozoite (amoeba) form colonizes the large intestine. Symptoms range from  
21 asymptomatic infection, diarrhea, bloody diarrhea, to fatal extraintestinal abscesses. The species  
22 name (*histo-*: tissue; *lytic-*: dissolve) refers to the capacity of the amoeba to damage human  
23 tissues. However, it is still unclear how amoebae invade and damage tissues. Virulence factors  
24 include the amoeba surface galactose and N-acetylgalactosamine (Gal/GalNAc)-inhibitable  
25 lectin that mediates attachment to human cells and other substrates (Petri, 2002) and cysteine  
26 proteases that degrade a variety of human substrates (*e.g.*, Reed, 1995, Lidell, 2006, Thibeaux,  
27 2012). In addition to these factors, the contact-dependent human-cell killing activity of *E.*  
28 *histolytica* (Ravdin, 1980a, Ravdin, 1981) is likely to be a major contributor to human tissue  
29 damage.

30 While it has been under investigation for many years, the mechanism by which amoebae  
31 kill human cells was previously unclear (Ralston, 2011). We defined that amoebae kill human  
32 cells *via* trogocytosis (*trogo-*: nibble) (Ralston, 2014). Amoebae attach to human cells and then  
33 physically extract “bites” of human cell membrane, cytoplasm and organelles, which eventually  
34 leads to human cell death. Amoebic trogocytosis requires engagement of the Gal/GalNAc lectin,  
35 actin rearrangements, PI3K and EhC2PK signaling (Ralston, 2014). Amoebic trogocytosis is  
36 necessary for invasion of *ex vivo* intestinal tissue, underlining its relevance to pathogenesis  
37 (Ralston, 2014). Trogocytosis might be evolutionarily-conserved (Ralston, 2015), therefore,  
38 studying this process in *E. histolytica* may give insight into eukaryotic trogocytosis, in addition  
39 to a better understanding of the pathogenesis of amoebiasis.

40           In order to better understand trophocytosis and its contribution to disease, there is a need  
41 for cell death assays that are accurate, practical and that can be applied to a variety of human cell  
42 types. Assaying human cell killing by *E. histolytica* is inherently challenging since readouts must  
43 specifically measure the viability of the human cells when they are mixed together with  
44 amoebae. For the greatest utility, assays must directly measure human cell viability, and readouts  
45 must be quantitative. While amoebae can kill essentially any human cell type (Ravdin, 1980b),  
46 most studies have focused on either monolayers or suspension cultures, but not both, since they  
47 are typically not amenable to the same assays. Thus, there is a need for flexible assays that can  
48 be applied to both monolayers and suspension cells. Although previously used assays have been  
49 important in advancing understanding of cell killing by amoebae, it is important to recognize  
50 their limitations and to develop new assays as newer technologies become available.

51           Assays that have been used can be broken down into membrane permeabilization,  
52 monolayer disruption, and apoptosis assays. Membrane permeabilization assays detect  
53 intracellular components that are released into the culture supernatant by dead cells. In these  
54 assays, amoebae are co-incubated with human cells, and the supernatant is measured. There are  
55 some technical and practical limitations to the lactate dehydrogenase (LDH) release and  
56 Chromium-51 ( $^{51}\text{Cr}$ ) release assays that have been used. LDH assays (*e.g.*, Li, 1994, Marie,  
57 2012) generally do not directly measure LDH and instead use the NAD cofactor to catalyze a  
58 reporter reaction (Riss, 2019). This means that other enzymatic activities in the culture  
59 supernatant that also use NAD as a cofactor can be problematic. By contrast, the  $^{51}\text{Cr}$  release  
60 assay specifically measures host cell lysis, since in this assay, host cells are pre-labeled with  
61  $^{51}\text{Cr}$ , and after incubation with amoebae,  $^{51}\text{Cr}$  in the culture supernatant is measured (*e.g.*, Saffer,

62 1991, Huston, 2001). However, a practical limitation is that this assay requires the use of a  
63 radioisotope.

64 Monolayer disruption assays have been used in many studies, but the major limitation is  
65 that monolayer disruption cannot be directly attributed to cell killing since amoebic cysteine  
66 protease activity disrupts monolayers (Tillack, 2006). In monolayer disruption assays, amoebae  
67 are incubated with host cell monolayers, and after washing, the remaining cells are stained with  
68 methylene blue (*e.g.*, Bracha, 1984, Teixeira, 2012). The amount of methylene blue is compared  
69 to control monolayers that were incubated without amoebae, to infer how many cells have been  
70 released. Trypan blue staining has also been used to stain dead cells remaining in the monolayer  
71 (*e.g.*, Ravdin, 1985, Bracha, 1999). However, since amoebic proteases cause disruption of  
72 monolayers (Tillack, 2006), neither version of this assay directly measures cell killing.

73 Finally, apoptosis assays have been used to study cell killing by amoebae (Seydel, 1998,  
74 Huston, 2001). In these assays, care must be taken to include controls that ensure the readout is  
75 specific to apoptosis. For example, DNA laddering can occur in other modes of cell death  
76 besides canonical apoptosis, and thus is not indicative of apoptotic cell death (Kroemer, 2008).  
77 As another example, annexin V staining to detect exposed phosphatidylserine must be combined  
78 with cell permeability stains like propidium iodide, in order to ensure that phosphatidylserine  
79 exposure is not simply the result of membrane damage. Notably, phosphatidylserine exposure is  
80 not a universal feature of apoptosis (Galluzzi, 2018). It is also important to note that apoptosis  
81 assays capture markers of apoptosis in dying cells, which differs from other cell death assays that  
82 measure cell death after it has occurred. Notably, in some cases, apoptosis can be reversed  
83 (Tang, 2012). Thus, cell death is inferred by these assays, but not directly measured.

84           To enable quantitative cell death measurements, we previously developed an assay using  
85 imaging flow cytometry (Ralston, 2014). In this assay, amoebae and human cells are  
86 fluorescently labeled, allowing for trophocytosis to be directly measured, and Live/Dead Violet is  
87 used to stain dead (permeable) cells (Ralston, 2014, Gilmartin, 2017, Miller, 2019). This assay  
88 allows for automated analysis of thousands of images per sample, but is limited in practicality  
89 since imaging flow cytometers are not widely available. This assay is more easily applied to  
90 study suspension cells, since cells must be in suspension during image acquisition; thus, imaging  
91 flow cytometry is limited in flexibility.

92           To address the limitations in practicality and flexibility of existing cell death assays, here  
93 we developed two complementary high-throughput assays for human cell death. We show that  
94 CellTiterGlo, a luminescent readout for cellular ATP levels, can be used as a proxy for human  
95 cell viability. We also develop a confocal microscopy-based assay with fluorescent stains to  
96 quantitatively differentiate live and dead human cells. Both assays are simple and inexpensive,  
97 and they can be used with suspension and adherent human cell types.

## 98 **2. Materials and Methods**

### 99 *2.1 Cell culture*

100 *E. histolytica* HM1:IMSS (ATCC) trophozoites were cultured in TYI-S-33 media,  
101 supplemented with 15% heat inactivated Adult Bovine Serum (Gemini Bio Products), 80  
102 units/mL penicillin and streptomycin (Gibco), and 2.3% Diamond Vitamin solution 80 Tween  
103 40x (Sigma Aldrich), at 35°C. Amoebae were harvested when flasks were approximately 80%  
104 confluent. Human Jurkat T cells, clone E6-1 (ATCC), were cultured in RPMI Medium 1640 with  
105 L-Glutamine and without Phenol Red (Gibco), supplemented with 10 mM HEPES (Affymetrix),  
106 100 units/mL penicillin and streptomycin (Gibco) and 10% heat inactivated Fetal Bovine Serum  
107 (Gibco), at 37°C with 5% CO<sub>2</sub>. Cells were harvested at approximately 1x10<sup>6</sup> cells/mL. Human  
108 Caco-2 colon epithelial cells, HTB-37 (ATCC), were cultured in MEM Medium (ATCC),  
109 supplemented with 20% Fetal Bovine Serum (Gibco), at 37°C with 5% CO<sub>2</sub>. Cells were  
110 passaged using 0.25% (w/v) Trypsin – 0.53 mM EDTA solution when 80-100% confluent.

### 111 *2.2 Knockdown mutants*

112 The EhROM1 silencing construct was generated by Morf, *et al.* (Morf, 2013), and  
113 contains 132 base pairs of the trigger gene (EHI\_048600) fused to the first 537 base pairs of  
114 EhROM1 (EHI\_197460). This plasmid, or a corresponding vector control, was transfected into  
115 amoebae using Attractene transfection reagent (Qiagen), and then stable transfectants were  
116 selected and maintained with Geneticin at 6 µg/mL (Invitrogen). Clonal lines were obtained by  
117 limiting dilution, and silencing was confirmed using RT-PCR (Miller, 2019). A single clonal line  
118 was used for experiments.

### 119 *2.3 CellTiterGlo Assay*

120 For experiments using Jurkat cells, amoebae and Jurkat cells were first washed in fresh  
121 TYI media. For the initial titration experiments (Fig. 1A – 1B), amoebae and Jurkat cells were  
122 resuspended to  $2 \times 10^6$  and  $1 \times 10^7$  cells/mL, respectively. For Cytochalasin D experiments,  
123 amoebae were first washed in fresh TYI media and pretreated with 20 nM Cytochalasin D from  
124 *Zygosporium mansonii* (Sigma Aldrich) or an equivalent volume of DMSO for 1 hour at 35°C.  
125 Cytochalasin D, or DMSO, was maintained at the same concentration when amoebae were  
126 subsequently co-incubated with Jurkat cells. For sugar inhibition experiments, amoebae were  
127 resuspended in fresh TYI media with no supplementation, 100 mM galactose (Sigma Aldrich), or  
128 100 mM mannose (Sigma Aldrich). For the initial co-incubation assays (Fig. 1C – 1D and Fig.  
129 S1), amoebae and Jurkat cells were resuspended to  $4 \times 10^5$  and  $2 \times 10^6$  cells/mL, respectively, to  
130 create a co-incubation ratio of 1 amoeba: 5 Jurkat cells. For all other co-incubation assays,  
131 amoebae and Jurkat cells were resuspended to  $4 \times 10^5$  and  $8 \times 10^6$  cells/mL respectively, to create a  
132 co-incubation ratio of 1:20.

133 50  $\mu$ L of amoebae or Jurkat cells were plated in 96 well plates (Corning 3603) either  
134 individually, with 50  $\mu$ L of TYI media, or together. Plates were placed in an anaerobic GasPak  
135 (BD) and incubated at 35°C for the appropriate time. At each time point, a plate was removed  
136 from the incubator and left at 25°C for 10 minutes to equilibrate. 100  $\mu$ L of CellTiterGlo solution  
137 was added to each well, using a multichannel pipette. Plates were then incubated at 25°C for 10  
138 minutes, with rocking, and then luminescence was detected using a 1 second exposure on a plate  
139 reader (PerkinElmer 2030 Victor). Two wells for each condition were averaged to generate one  
140 value per condition, and at least three experiments were performed independently on different  
141 days. Both raw data from individual experiments and normalized data from multiple independent



142 experiments are presented in the figures. For normalization, data from multiple independent  
143 experiments were normalized to the T = 0 time point for each sample.

144 For experiments using Caco-2 cells, 18-24 hours prior to performing the experiment, 100  
145  $\mu\text{L}$  of Caco-2 cells were plated in to three 96-well plates (Corning 3603) at a concentration of  
146  $2.6 \times 10^5$  cells/mL. On the day of the CellTiterGlo assay, wells containing Caco-2 cells were  
147 gently washed with 200  $\mu\text{L}$  of fresh TYI, twice. Amoebae were washed in fresh TYI media and  
148 resuspended to  $2.6 \times 10^4$  cells/mL. 100  $\mu\text{L}$  of amoebae were added to wells containing Caco-2  
149 cells to create an approximate co-incubation ratio of 1 amoeba: 10 Caco-2 cells. Plates were  
150 incubated and treated with CellTiterGlo as described above. Three wells of amoebae alone, six  
151 wells of Caco-2 cells alone, and six wells of co-incubated samples were averaged to obtain one  
152 value per condition, and three experiments were performed independently on different days.

#### 153 *2.4 Dual-Stain Microscopy Assay*

154 For experiments using Jurkat cells, amoebae were washed in fresh TYI media and pre-  
155 treated with 20 nM Cytochalasin D from *Zygosporium mansonii* (Sigma Aldrich) or an  
156 equivalent volume of DMSO for 1 hour at 35°C. Cytochalasin D, or DMSO, was maintained at  
157 the same concentration when amoebae were subsequently co-incubated with Jurkat cells. Jurkat  
158 cells were pre-labeled with Hoechst 33342 (Invitrogen) at 5  $\mu\text{g}/\text{ml}$  for 30 minutes at 37°C.  
159 Amoebae and Jurkat cells were then washed in M199S (Gibco M199 with Earle's Salts, L-  
160 Glutamine, 2.2 g/L Sodium Bicarbonate and without Phenol Red, and supplemented with 5.7  
161 mM L-cysteine (Sigma-Aldrich), 25 mM HEPES (Sigma-Aldrich) and 0.5% bovine serum  
162 albumin (Gemini Bio-Products)). Amoebae and Jurkat cells were then resuspended to  $2 \times 10^5$  and  
163  $1 \times 10^6$  cells/mL, respectively in M199S containing 20 nM SYTOX green (Thermo), and 20 nM  
164 Cytochalasin D or an equivalent volume of DMSO. 1 mL of each cell type was added to 35 mm

165 glass bottom petri dishes containing a N° 1.5 coverglass (MatTek). Petri dishes were warmed to  
166 35°C for 15 minutes before use. Cells were co-incubated at 35°C for 60 minutes before confocal  
167 microscopy imaging. Cells were imaged using a stage warmer set to 35°C on either an Intelligent  
168 Imaging Innovations hybrid spinning disk confocal microscope or an Olympus FV1000 laser  
169 point-scanning confocal microscope. Two experiments were performed independently on  
170 different days, and 350-500 human cells were counted for each condition.

171 For experiments using Caco-2 cells, Caco-2 cells were cultured on collagen-coated (5  
172  $\mu\text{g}/\text{cm}^2$  Collagen I Rat Tail, Gibco) glass bottom petri dishes containing a N° 1.5 coverglass  
173 (MatTek). Experiments were performed when cells were ~80% confluent. Caco-2 cells were pre-  
174 labeled by incubation in 2 mL of M199S containing Hoechst 33342 at 5  $\mu\text{g}/\text{ml}$  for 30 minutes at  
175 37°C. Amoebae and Caco-2 cells were then washed in M199S. Amoebae were resuspended to  
176  $1 \times 10^5$  cells/mL in M199S containing 20 nM SYTOX green, and 2 mL of amoebae were then  
177 added to each plate containing Caco-2 cells. Plates were then incubated at 35°C. Cells were  
178 imaged using a stage warmer set to 35°C on an Olympus FV1000 laser point-scanning confocal  
179 microscope.

## 180 *2.5 Statistical Analysis*

181 GraphPad Prism was used to calculate best fit line and  $R^2$  values, and for student's  
182 unpaired  $t$  test statistical analysis. Mean values and standard deviations are shown in the figures,  
183 with  $t$  test values reported as follows: ns =  $P > 0.05$ , \* =  $P < 0.05$ , \*\* =  $P < 0.01$ , \*\*\* =  $P <$   
184  $0.001$ , \*\*\*\* =  $P < 0.0001$ .

185

### 186 3. Results

187 CellTiterGlo is a very simple, high-throughput assay for cell viability that is based on  
188 cellular ATP levels. We reasoned that since human cells are present in excess of amoebae, they  
189 should contribute to the majority of the CellTiterGlo luminescence signal in a co-incubation. We  
190 first asked whether luminescence values correlated with the number of amoebae (Fig. 1A) or  
191 human Jurkat T cells per well (Fig. 1B), and found that luminescence was correlated with cell  
192 number. Next, amoebae and Jurkat cells were co-incubated, or as controls, Jurkat human cells or  
193 amoebae were incubated alone. In these controls, the equivalent number of cells were loaded per  
194 well to correspond to the number of cells present in the co-incubation experimental condition. As  
195 anticipated, in the controls, the luminescence values were higher for human cells than for  
196 amoebae (Fig. 1C – 1D). When human cells and amoebae were co-incubated, the luminescence  
197 value initially corresponded to roughly the sum of the human cell and amoeba individual values,  
198 and then decreased over time. The luminescence values of the co-incubation were significantly  
199 lower than the values for human cells incubated alone (Fig. 1D). Reduced variability was  
200 observed when samples were incubated in an anaerobic GasPak (Fig. 1C – 1D), compared to an  
201 aerobic environment (Fig. S1), consistent with the microaerophilic metabolism of *E. histolytica*.  
202 Therefore, we concluded that human cell killing by amoebae can be quantitatively measured  
203 using CellTiterGlo.

204 We next asked whether this assay was sensitive to conditions that inhibit human cell  
205 killing by amoebae. Trophocytosis by *E. histolytica* requires actin rearrangements and is inhibited  
206 by treatment with cytochalasin D (Ralston, 2014). Therefore, cytochalasin D-treated or DMSO  
207 control-treated amoebae were co-incubated with Jurkat cells, and cell viability was measured  
208 using CellTiterGlo (Fig. 2A – 2B). Cytochalasin D-treated amoebae were significantly less able

209 to kill human cells, as seen by the increased CellTiterGlo signal compared to control amoebae  
210 (Fig. 2A – 2B). For human cells or amoebae incubated alone, cytochalasin D treatment did not  
211 affect viability (Fig. S2A). We next tested if CellTiterGlo was sensitive to inhibition of the  
212 amoeba surface Gal/GalNAc lectin. Amoeba must attach to human cells in order to kill them,  
213 and this attachment is mediated by the amoebic GalNAc lectin (Petri, 2002). Galactose-treated  
214 amoebae were significantly less able to kill human cells, compared to control mannose-treated  
215 amoebae (Fig. 2C, S2B). Finally, we tested knockdown mutant amoebae deficient in a rhomboid  
216 protease, EhRom1, which has a characterized role in attachment to human cells (Baxt, 2008,  
217 Baxt, 2010). There was no significant difference in the cell killing ability between EhRom1  
218 knockdown mutants and vector control amoebae (Fig. 2D, S2C). This is consistent with the lack  
219 of a trogocytosis defect in EhRom1 mutants (Miller, 2019). Taken together, we concluded that  
220 the CellTiterGlo assay is sensitive to the inhibition of human cell killing by amoebae.

221 We next sought to extend this assay to other human cell types, since many assays for cell  
222 killing are difficult to adapt to both suspension and monolayer cells. Therefore, we adapted the  
223 CellTiterGlo assay to human Caco-2 intestinal epithelial cell monolayers. CellTiterGlo  
224 luminescence values correlated closely with the number of amoebae or Caco-2 cells per well  
225 (Fig. 3A – 3B). When Caco-2 cells and amoebae were co-incubated, the luminescence value  
226 initially corresponded to roughly the sum of the human cell and amoeba individual values (Fig.  
227 3C). The luminescence values of the co-incubation were significantly lower than the values for  
228 human cells incubated alone (Fig. 3D). These results show that CellTiterGlo can be applied to  
229 assay killing of both suspension and monolayer cells.

230 We next developed a microscopy-based assay to directly measure human cell killing by  
231 amoebae. Since human cell nuclei are not internalized during amoebic trogocytosis (Ralston,

232 2014), we devised a strategy with two different nuclear stains to distinguish living and dead  
233 human cells. Human cell nuclei were pre-labeled with Hoechst. During co-incubation, SYTOX  
234 green was present in the media. SYTOX green is a nucleic acid stain that is excluded by living  
235 cells, but is taken up by dead cells because they have permeable membranes. Thus, live human  
236 cells are labeled only by Hoechst, while dead human cells are dual-labeled by both Hoechst and  
237 SYTOX green (Supplemental Video 1). To test this dual-stain assay, cytochalasin D treatment  
238 was used to inhibit amoebic trophocytosis. Amoebae were treated with cytochalasin D or DMSO,  
239 and co-incubated with human Jurkat T cells (Fig. 4A). Cytochalasin D-treated amoebae killed  
240 less than 2% of Jurkat cells in 60 minutes (Fig. 4B). By comparison, control amoebae killed 40%  
241 of Jurkat cells in 60 minutes. This assay provides a quantitative readout for cell killing, and it is  
242 robust enough to be amenable to imaging large fields of cells at low magnification (Fig. 4C).  
243 Finally, this dual-stain assay can be applied to Caco-2 epithelial cells (Fig. 5 and Supplemental  
244 Videos 2 – 3), demonstrating that it is versatile with respect to human cell types.  
245

246 **4. Discussion**

247 In this study, we developed two assays for human cell killing by *E. histolytica*. The  
248 CellTiterGlo assay biochemically measures cellular ATP levels, and the dual-stain microscopy  
249 assay allows for direct visualization of human cell death with fluorescent stains. These assays  
250 complement the currently available cell death assays and bring their own unique strengths and  
251 weaknesses.

252 The CellTiterGlo assay is simple and practical. Only a plate reader is required for the  
253 readout. The assay requires few manipulations and no washing steps; CellTiterGlo solution is  
254 added directly to cells, and after a brief incubation, luminescence is measured on a plate reader.  
255 Since this assay is robust and requires very few steps, the procedure is amenable to high  
256 throughput screening. Indeed, CellTiterGlo has previously been used in a high throughput screen  
257 for drugs that kill *E. histolytica* (Debnath, 2012). The limitation of this assay is that it does not  
258 directly measure human cell death. Because human cells greatly outnumber amoebae in this  
259 assay, they contribute the majority of the ATP to the readout, and thus, a decrease in  
260 luminescence can be inferred to represent human cell death. Also, similar to the limitations of  
261 apoptosis assays, ATP levels are correlated with dying cells, but do not clearly define the “point  
262 of no return” when a cell is by definition, dead (Leist, 1997, Bonora, 2012). The depletion of  
263 ATP below a threshold, combined with redox alterations, has been proposed to mark the “point  
264 of no return” (Galluzzi, 2015), however, it would be difficult to infer from an assay like  
265 CellTiterGlo that the level of ATP has definitively crossed a threshold. However, the major  
266 strengths of this assay are the simplicity and adaptability to high throughput approaches. This is  
267 an area where none of the existing cell death assays are useful. Thus, we propose that this assay  
268 is most useful for initial screening of mutants or candidate inhibitors. Finally, since monolayers

269 can be grown directly in the plates used for this assay, it is easily adaptable to both monolayers  
270 and suspension cells.

271         The dual-stain microscopy-based cell death assay is also simple and practical. We used  
272 confocal microscopy for imaging, but this is not necessary, as widefield fluorescence  
273 microscopes can also be used. The major strength of this assay is that it directly measures human  
274 cell death. Dead cells are labeled, thus human cell death can be directly quantified within a  
275 mixture of human cells and amoebae. Moreover, the readout for cell death in this assay is loss of  
276 membrane integrity, which is a direct marker of cells that are dead (Kroemer, 2008). Thus, this  
277 assay, together with the imaging flow cytometry assay that we developed (Ralston, 2014),  
278 represents the most direct assays available for human cell killing for *E. histolytica*. The dual-  
279 stain assay is more practical and easy to apply, since imaging flow cytometers are not widely  
280 available. Like imaging flow cytometry, the dual-stain assay can be applied to medium  
281 throughput approaches, as it could be performed by using cells in plates and by imaging on high  
282 content screening microscopes. The limitation of this assay is that the readout is not inherently  
283 quantitative, and requires counting of labeled cell nuclei. We did not develop automated image  
284 analysis, but this would be possible, and would ensure that the readout is unbiased and efficient.  
285 Because both stains label the same cellular feature, the nucleus, automated image analysis should  
286 be particularly robust. Finally, like the CellTiterGlo assay, the dual-stain microscopy assay is  
287 amenable to both monolayer and suspension cell cultures.

288         Together, these assays expand the repertoire of available tools for studying human cell  
289 killing by *E. histolytica*. They are particularly simple and practical, and thus we believe they are  
290 suitable for wide application. These assays also pave the way for high-throughput studies. Since  
291 cell killing by *E. histolytica* is likely to underlie disease pathogenesis, these tools are expected to

292 allow for an improved understanding of the mechanism of disease, and may be applicable to the  
293 development of new therapeutics.



294 *Acknowledgments*

295           We thank the MCB Microscopy Imaging Facility at UC Davis for use of core  
296 microscopes and technical assistance. We thank the Ralston lab for stimulating discussions and  
297 support. This work was supported by NIH grant 1R01AI146914 and a Pew Scholarship awarded  
298 to K.S.R., and the UC Davis Biotechnology Training Program fellowship awarded to A.B.  
299 Declaration of interest: none.

300 **References**

- 301 Baxt, L. A., Baker, R. P., Singh, U. and Urban, S. (2008). "An Entamoeba histolytica rhomboid  
302 protease with atypical specificity cleaves a surface lectin involved in phagocytosis and  
303 immune evasion." *Genes Dev* 22(12): 1636-1646.
- 304 Baxt, L. A., Rastew, E., Bracha, R., Mirelman, D. and Singh, U. (2010). "Downregulation of an  
305 Entamoeba histolytica rhomboid protease reveals roles in regulating parasite adhesion and  
306 phagocytosis." *Eukaryot Cell* 9(8): 1283-1293.
- 307 Bonora, M., Patergnani, S., Rimessi, A., De Marchi, E., Suski, J. M., Bononi, A., Giorgi, C.,  
308 Marchi, S., Missiroli, S., Poletti, F., Wieckowski, M. R. and Pinton, P. (2012). "ATP synthesis  
309 and storage." *Purinergic Signal* 8(3): 343-357.
- 310 Bracha, R. and Mirelman, D. (1984). "Virulence of Entamoeba histolytica trophozoites." *J.*  
311 *Exp. Med* 160: 353-368.
- 312 Bracha, R., Nuchamowitz, Y., Leippe, M. and Mirelman, D. (1999). "Antisense inhibition of  
313 amoebapore expression in Entamoeba histolytica causes a decrease in amoebic virulence."  
314 *Molecular Microbiology* 34(3): 463-472.
- 315 Debnath, A., Parsonage, D., Andrade, R. M., He, C., Cobo, E. R., Hirata, K., Chen, S., García-  
316 Rivera, G., Orozco, E., Martínez, M. B., Gunatilleke, S. S., Barrios, A. M., Arkin, M. R., Poole, L.  
317 B., McKerrow, J. H. and Reed, S. L. (2012). "A high-throughput drug screen for Entamoeba  
318 histolytica identifies a new lead and target." *Nature Med* 18(6): 956-960.
- 319 Galluzzi, L., Bravo-San Pedro, J. M., Vitale, I., Aaronson, S. A., Abrams, J. M., Adam, D.,  
320 Alnemri, E. S., Altucci, L., Andrews, D., Annicchiarico-Petruzzelli, M., Baehrecke, E. H., Bazan,  
321 N. G., Bertrand, M. J., Bianchi, K., Blagosklonny, M. V., Blomgren, K., Borner, C., Bredesen, D.  
322 E., Brenner, C., Campanella, M., Candi, E., Cecconi, F., Chan, F. K., Chandel, N. S., Cheng, E. H.,

323 Chipuk, J. E., Cidlowski, J. A., Ciechanover, A., Dawson, T. M., Dawson, V. L., De Laurenzi, V.,  
324 De Maria, R., Debatin, K. M., Di Daniele, N., Dixit, V. M., Dynlacht, B. D., El-Deiry, W. S., Fimia,  
325 G. M., Flavell, R. A., Fulda, S., Garrido, C., Gougeon, M. L., Green, D. R., Gronemeyer, H.,  
326 Hajnoczky, G., Hardwick, J. M., Hengartner, M. O., Ichijo, H., Joseph, B., Jost, P. J., Kaufmann,  
327 T., Kepp, O., Klionsky, D. J., Knight, R. A., Kumar, S., Lemasters, J. J., Levine, B., Linkermann,  
328 A., Lipton, S. A., Lockshin, R. A., Lopez-Otin, C., Lugli, E., Madeo, F., Malorni, W., Marine, J. C.,  
329 Martin, S. J., Martinou, J. C., Medema, J. P., Meier, P., Melino, S., Mizushima, N., Moll, U.,  
330 Munoz-Pinedo, C., Nunez, G., Oberst, A., Panaretakis, T., Penninger, J. M., Peter, M. E.,  
331 Piacentini, M., Pinton, P., Prehn, J. H., Puthalakath, H., Rabinovich, G. A., Ravichandran, K. S.,  
332 Rizzuto, R., Rodrigues, C. M., Rubinsztein, D. C., Rudel, T., Shi, Y., Simon, H. U., Stockwell, B.  
333 R., Szabadkai, G., Tait, S. W., Tang, H. L., Tavernarakis, N., Tsujimoto, Y., Vanden Berghe, T.,  
334 Vandenabeele, P., Villunger, A., Wagner, E. F., Walczak, H., White, E., Wood, W. G., Yuan, J.,  
335 Zakeri, Z., Zhivotovsky, B., Melino, G. and Kroemer, G. (2015). "Essential versus accessory  
336 aspects of cell death: recommendations of the NCCD 2015." *Cell Death Differ* 22(1): 58-73.  
337 Galluzzi, L., Vitale, I., Aaronson, S., Abrams, J., Adam, D., Agostinis, P., Alnemri, E., Altucci, L.,  
338 Amelio, I., Andrews, D., Annicchiarico-Petruzzelli, M., Antonov, A., Arama, E., Baehrecke, E.,  
339 Barlev, N., Bazan, N., Bernassola, F., Bertrand, M., Bianchi, K., Blagosklonny, MV, Blomgren,  
340 K., Borner, C., Boya, P., Brenner, C., Campanella, M., Candi, E., Carmona-Gutierrez, D.,  
341 Ceccon, i. F., Chan, F., Chandel, N., Cheng, E., Chipuk, J., Cidlowski, J., Ciechanover, A., Cohen,  
342 G., Conrad, M., Cubillos-Ruiz, J., Czabotar, PE, D'Angiolella, V., Dawson, T., Dawson, V., De  
343 Laurenzi, V., De Maria, R., Debatin, K., DeBerardinis, RJ, Deshmukh, M., Di Daniele, N., Di  
344 Virgilio, F., Dixit, V., Dixon, S., Duckett, C., Dynlacht, B., El-Deiry, W., Elrod, J., Fimia, G., Fulda,  
345 S., García-Sáez, A., Garg, A., Garrido, C., Gavathiotis, E., Golstein, P., Gottlieb, E., Green, D.,

346 Greene, L., Gronemeyer, H., Gross, A., Hajnoczky, G., Hardwick, J., Harris, I., Hengartner, M.,  
347 Hetz, C., Ichijo, H., Jäättelä, M., Joseph, B., Jost, P., Juin, P., Kaiser, W., Karin, M., Kaufmann, T.,  
348 Kepp, O., Kimchi, A., Kitsis, R., Klionsky, D., Knight, R., Kumar, S., Lee, S., Lemasters, J.,  
349 Levine, B., Linkermann, A., Lipton, S., Lockshin, R., López-Otín, C., Lowe, S., Luedde, T., Lugli,  
350 E., MacFarlane, M., Madeo, F., Malewicz, M., Malorni, W., Manic, G., Marine, J., Martin, S.,  
351 Martinou, J., Medema, J., Mehlen, P., Meier, P., Melino, S., Miao, E., Molkentin, J., Moll, U.,  
352 Muñoz-Pinedo, C., Nagata, S., Nuñez, G., Oberst, A., Oren, M., Overholtzer, M., Pagano, M.,  
353 Panaretakis, T., Pasparakis, M., Penninger, J., Pereira, D., Pervaiz, S., Peter, M., Piacentini, M.,  
354 Pinton, P., Prehn, J., Puthalakath, H., Rabinovich, G., Rehm, M., Rizzuto, R., Rodrigues, C.,  
355 Rubinsztein, D., Rudel, T., Ryan, K., Sayan, E., Scorrano, L., Shao, F., Shi, Y., Silke, J., Simon, H.,  
356 Sistigu, A., Stockwell, B., Strasser, A., Szabadkai, G., Tait, S., Tang, D., Tavernarakis, N.,  
357 Thorburn, A., Tsujimoto, Y., Turk, B., Vanden Berghe, T., Vandenabeele, P., Vander Heiden,  
358 M., Villunger, A., Virgin, H., Vousden, K., Vucic, D., Wagner, E., Walczak, H., Wallach, D., Wang,  
359 Y., Wells, J., Wood, W., Yuan, J., Zakeri, Z., Zhivotovsky, B., Zitvogel, L., Melino, G. and  
360 Kroemer, G. (2018). "Molecular mechanisms of cell death: recommendations of the  
361 Nomenclature Committee on Cell Death 2018." *Cell Death Differ* 25(3): 486-541.  
362 Gilmartin, A., Ralston, K. and Petri, W. J. (2017). "Inhibition of Amebic Lysosomal  
363 Acidification Blocks Amebic Trophocytosis and Cell Killing." *mBio* 8(4).  
364 Huston, C. D., Houpt, E. R., Mann, B. J., Hahn, C. S. and Petri, W. A., Jr. (2001). "Caspase 3 -  
365 dependent killing of host cells by the parasite *Entamoeba histolytica*." *Cellular*  
366 *Microbiology* 2(6).  
367 Kroemer, G., Galluzzi, L., Vandenabeele, P., Abrams, J., Alnemri, E. S., Baehrecke, E. H.,  
368 Blagosklonny, M. V., El-Deiry, W. S., Golstein, P., Green, D. R., Hengartner, M., Knight, R. A.,

369 Kumar, S., Lipton, S. A., Malorni, W., Nuñez, G., Peter, M. E., Tschopp, J., Yuan, J., Piacentini,  
370 M., Zhivotovsky, B. and Melino, G. (2008). "Classification of cell death: recommendations of  
371 the Nomenclature Committee on Cell Death 2009." *Cell Death & Differentiation* 16(1): 3-11.  
372 Leist, M., Single, B., Castoldi, A. F., Kuhnle, S. and Nicotera, P. (1997). "Intracellular  
373 Adenosine Triphosphate (ATP) Concentration: A Switch in the Decision Between Apoptosis  
374 and Necrosis." *Journal of Experimental Medicine* 185(8).  
375 Li, E., Stenson, W. F., Kunz-Jenkins, C., Swanson, P. E., Duncan, R. and Stanley, S. L. J. (1994).  
376 "Entamoeba histolytica Interactions with Polarized Human Intestinal Caco-2 Epithelial  
377 Cells." *Infection and Immunity* 62(11): 5112-5119.  
378 Lidell, M. E., Moncada, D. M., Chadee, K. and Hansson, G. C. (2006). "Entamoeba histolytica  
379 cysteine proteases cleave the MUC2 mucin in its C-terminal domain and dissolve the  
380 protective colonic mucus gel." *Proc Natl Acad Sci U S A* 103(24): 9298-9303.  
381 Marie, C. S., Verkerke, H. P., Paul, S. N., Mackey, A. J., Petri, W. A. Jr. (2012). "Leptin protects  
382 host cells from Entamoeba histolytica cytotoxicity by a STAT3-dependent mechanism. ."  
383 *Infect Immun* 80(5): 1934-1943.  
384 Miller, H. W., Suleiman, R. L. and Ralston, K. S. (2019). "Trogoctosis by Entamoeba  
385 histolytica Mediates Acquisition and Display of Human Cell Membrane Proteins and  
386 Evasion of Lysis by Human Serum." *mBio* 10(2).  
387 Morf, L., Pearson, R. J., Wang, A. S. and Singh, U. (2013). "Robust gene silencing mediated by  
388 antisense small RNAs in the pathogenic protist Entamoeba histolytica." *Nucleic Acids*  
389 *Research* 41(20): 9424-9437.

390 Petri, W. A., Jr., Haque, R. and Mann, B. J. (2002). "The bittersweet interface of parasite and  
391 host: lectin-carbohydrate interactions during human invasion by the parasite *Entamoeba*  
392 *histolytica*." *Annu Rev Microbiol* 56: 39-64.

393 Ralston, K. S. (2015). "Taking a bite: Amoebic trophocytosis in *Entamoeba histolytica* and  
394 beyond." *Curr Opin Microbiol* 28: 26-35.

395 Ralston, K. S. and Petri, W. A., Jr (2011). "Tissue destruction and invasion by *Entamoeba*  
396 *histolytica*." *Trends Parasitol* 27(6): 254-263.

397 Ralston, K. S., Solga, M. D., Mackey-Lawrence, N. M., Somlata, Bhattacharya, A. and Petri, W.  
398 A., Jr. (2014). "Trophocytosis by *Entamoeba histolytica* contributes to cell killing and tissue  
399 invasion." *Nature* 508(7497): 526-530.

400 Ravdin, J. I., Croft, B. Y. and Guerrant, R. L. (1980). "Cytopathogenic mechanisms of  
401 *Entamoeba histolytica*." *J Exp Med* 152(2): 377-390. (a)

402 Ravdin, J. I. and Guerrant, R. L. (1980). "Studies on the cytopathogenicity of *Entamoeba*  
403 *histolytica*." *Arch. Invest. Med. (Mex)* 11: 123-128. (b)

404 Ravdin, J. I. and Guerrant, R. L. (1981). "Role of adherence in cytopathogenic mechanisms of  
405 *Entamoeba histolytica*. Study with mammalian tissue culture cells and human  
406 erythrocytes." *J Clin Invest* 68(5): 1305-1313.

407 Ravdin, J. I., Murphy, C. F., Guerrant, R. L. and Long-Krug, S. A. (1985). "Effect of Antagonists  
408 of Calcium and Phospholipase A on the Cytopathogenicity of *Entamoeba histolytica*." *The*  
409 *Journal of Infectious Diseases* 152(3): 542-549.

410 Reed, S., Ember, J., Herdman, D., DiScipio, R., Hugli, T. and Gigli, I. (1995). "The extracellular  
411 neutral cysteine proteinase of *Entamoeba histolytica* degrades anaphylatoxins C3a and  
412 C5a." *J Immunol* 155(1): 266-274.

413 Riss, T. and Niles, A., Moravec, R, Karassina, N, Vidugiriene, J (2019). Cytotoxicity Assays: In  
414 Vitro Methods to Measure Dead Cells. Bethesda (MD), Eli Lilly & Company and the National  
415 Center for Advancing Translational Sciences.

416 Saffer, L. D. and Petri, W. A. (1991). "Role of the galactose lectin of *Entamoeba histolytica* in  
417 adherence-dependent killing of mammalian cells." *Infection and Immunity* 59(12): 4681-  
418 4683.

419 Seydel, K. and Stanley, S. J. (1998). "Entamoeba histolytica induces host cell death in amebic  
420 liver abscess by a non-Fas-dependent, non-tumor necrosis factor alpha-dependent pathway  
421 of apoptosis." *Infect Immun.* 66(6): 2980-2983.

422 Tang, H., Tang, H., Mak, K., Hu, S., Wang, S., Wong, K., Wong, C., Wu, H., Law, H., Liu, K.,  
423 Talbot, C. J., Lau, W., Montell, D. and Fung, M. (2012). "Cell survival, DNA damage, and  
424 oncogenic transformation after a transient and reversible apoptotic response." *Mol Biol*  
425 *Cell* 23(12): 2240-2252.

426 Teixeira, J. E., Sateriale, A., Bessoff, K. E. and Huston, C. D. (2012). "Control of *Entamoeba*  
427 *histolytica* Adherence Involves Metalloprotease 1, an M8 Family Surface  
428 Metalloprotease with Homology to Leishmanolysin." *Infect Immun* 80(6): 2165–2176.

429 Thibeaux, R., Dufour, A., Roux, P., Bernier, M., Baglin, A. C., Frileux, P., Olivo-Marin, J. C.,  
430 Guillen, N. and Labruyere, E. (2012). "Newly visualized fibrillar collagen scaffolds dictate  
431 *Entamoeba histolytica* invasion route in the human colon." *Cell Microbiol* 14(5): 609-621.

432 Tillack, M., Nowak, N., Lotter, H., Bracha, R., Mirelman, D., Tannich, E. and Bruchhaus, I.  
433 (2006). "Increased expression of the major cysteine proteinases by stable episomal  
434 transfection underlines the important role of EhCP5 for the pathogenicity of *Entamoeba*  
435 *histolytica*." *Molecular and Biochemical Parasitology* 149(1): 58-64.

436 *Figure legends*

437 **Figure 1: CellTiterGlo can be used to assay Jurkat cell killing by amoebae.** (A) A dilution  
438 series of amoebae, or (B) human Jurkat T cells was assayed using CellTiterGlo. Best fit lines and  
439  $R^2$  values are shown. CellTiterGlo signal correlates with the number of cells per well. Data  
440 represent the average values of two replicate wells for each cell concentration, and are  
441 representative of 3 independent experiments. (C) Amoebae were co-incubated (filled circles)  
442 with Jurkat cells at a 1:5 ratio, or amoebae (filled triangles) and Jurkat cells (filled squares) were  
443 incubated separately as controls. Data represent the average values of two replicate wells for  
444 each sample, from one experiment. (D) Data from 2 independent experiments performed as in  
445 Panel C were normalized to the value of each sample at Time = 0. There were statistically  
446 significant differences between the co-incubation and Jurkat alone samples, as indicated.

447

448 **Figure 2: CellTiterGlo can be used to assay trophocytosis inhibition and attachment**  
449 **inhibition.** (A) Amoebae and human Jurkat T cells were treated with Cytochalasin D (open  
450 symbols) or DMSO (filled symbols). Amoebae were co-incubated (circles) with Jurkat cells at a  
451 1:20 ratio, or amoebae (triangles) and Jurkat cells (squares) were incubated separately as  
452 controls. Viability was assayed by using CellTiterGlo. Data represent the average values of two  
453 replicate wells for each sample, from one experiment. (B) Data from 4 independent experiments  
454 performed as in panel A were normalized to the value of each sample at Time = 0. (C) Amoebae  
455 and Jurkat cells were incubated in media containing galactose, mannose, or no added sugar. Cells  
456 were co-incubated at a 1:20 ratio, or incubated separately as controls. Viability was assayed by  
457 using CellTiterGlo. Data from 3 independent experiments were normalized to the value of each  
458 sample at Time = 0. (D) Amoebae were transfected with an EhRom1 knockdown plasmid, or a



459 vector control plasmid. Transfectants, or wild-type non-transfected amoebae, were co-incubated  
460 with Jurkat cells at a 1:20 ratio, or incubated separately as controls. Data from 3 independent  
461 experiments were normalized to the value of each sample at Time = 0.

462

463 **Figure 3: CellTiterGlo can be used to assay Caco-2 cell killing by amoebae.** (A) A dilution  
464 series of amoebae, or (B) human Caco-2 intestinal epithelial cells was assayed using  
465 CellTiterGlo. Best fit lines and  $R^2$  values are shown. CellTiterGlo signal correlates with the  
466 number of cells per well. Data represent the average values of two replicate wells for each cell  
467 concentration, and are representative of 3 independent experiments. (C) Amoebae were co-  
468 incubated (filled circles) with Caco-2 cells, or amoebae (filled triangles) and Caco-2 cells (filled  
469 squares) were incubated separately as controls. Data represent the average values of two replicate  
470 wells for each sample, from one experiment. (D) Data from 3 independent experiments  
471 performed as in panel C were normalized to the value of each sample at Time = 0. There were  
472 statistically significant differences between the co-incubation and Caco-2 alone samples, as  
473 indicated.

474

475 **Figure 4: A dual-stain microscopy assay can be used to quantitatively and directly detect**  
476 **Jurkat cell killing by amoebae.** (A) Amoebae and Hoechst-labeled human Jurkat T cells were  
477 treated with Cytochalasin D or DMSO, and co-incubated for 60 minutes in the presence of  
478 SYTOX green. Representative images are shown. Living human cells are labeled by Hoechst  
479 (blue), while dead human cells are labeled by both Hoechst and SYTOX green (green) and  
480 appear as turquoise in the merged image. An example of a living cell (arrow) and a dead cell  
481 (arrowhead) are indicated. Scale bar, 50  $\mu\text{m}$ . (B) Human cell death was assayed by quantifying

482 the number of single-stained (Hoechst) and dual-stained (Hoescht and SYTOX green) human  
483 cell nuclei, which correspond to living and dead human cells, respectively. Data are  
484 representative of 2 independent experiments. (C) Representative images demonstrating that the  
485 dual-stain assay can be applied to low magnification objectives, allowing for a greater number of  
486 cells to be imaged per field. Scale bar, 50  $\mu\text{m}$ .

487

488 **Figure 5: A dual-stain microscopy assay can be used to directly detect Caco-2 cell killing by**  
489 **amoebae.** Amoebae and Hoechst-labeled human Caco-2 intestinal epithelial cells were co-  
490 incubated in the presence of SYTOX green. Living human cells are labeled by Hoechst (blue),  
491 while dead human cells are labeled by both Hoechst and SYTOX green (green) and appear as  
492 turquoise in the merged image. The arrow indicates an example of a Caco-2 cell that is initially  
493 living and labeled only by Hoechst, but is eventually killed by an amoeba, at which time it  
494 becomes labeled by SYTOX green (arrowhead). Data are representative of 2 independent  
495 experiments. Scale bar, 50  $\mu\text{m}$ .

496 **Supplemental Figure 1: Greater variability is observed in the CellTiterGlo assay when cells**  
497 **are incubated without an anaerobic GasPak. (A)** Amoebae were co-incubated (filled circles)  
498 with Jurkat cells at a 1:5 ratio, or amoebae (filled triangles) and Jurkat cells (filled squares) were  
499 incubated separately as controls. Data represent the average values of two replicate wells for  
500 each sample, from one experiment. **(B)** Data from 2 independent experiments performed as in  
501 Panel A were normalized to the value of each sample at Time = 0. There were statistically  
502 significant differences between the co-incubation and Jurkat cell samples, as indicated.

503

504 **Supplemental Figure 2: Additional controls for the CellTiterGlo assay data shown in**  
505 **Figure 2. (A)** Amoebae and human Jurkat T cells were treated with Cytochalasin D or DMSO  
506 and viability was assayed using CellTiterGlo. Data from 4 independent experiments were  
507 normalized to the value of each sample at Time = 0. **(B)** Amoebae and Jurkat cells were  
508 incubated in media containing galactose, mannose, or no added sugar, and viability was assayed  
509 using CellTiterGlo. Data from 3 independent experiments were normalized to the value of each  
510 sample at Time = 0. **(C)** Amoebae were transfected with an EhRom1 knockdown plasmid, or a  
511 vector control plasmid. The viability of transfectants, wild-type non-transfected amoebae, and  
512 Jurkat cells was assayed using CellTiterGlo. Data from 3 independent experiments were  
513 normalized to the value of each sample at Time = 0.

514 **Supplemental Video 1: A dual-stain microscopy assay directly detects Jurkat cell killing by**  
515 **amoebae.** Amoebae and Hoechst-labeled human Jurkat T cells were co-incubated in the  
516 presence of SYTOX green. A representative video is shown, covering 20 minutes, captured at 2  
517 frames/minute. Living human cells are labeled by Hoechst (blue), while dead human cells are  
518 labeled by both Hoechst and SYTOX green (green) and appear as turquoise in the merged video.  
519 Data are representative of 2 independent experiments.

520

521 **Supplemental Videos 2 and 3: A dual-stain microscopy assay directly detects Caco-2 cell**  
522 **killing by amoebae.** Amoebae and Hoechst-labeled human Caco-2 intestinal epithelial cells  
523 were co-incubated in the presence of SYTOX green. Representative videos are shown. Videos  
524 each follow the same field of cells and cover 20 minutes, captured at 1 frame/minute. Living  
525 human cells are labeled by Hoechst (blue), while dead human cells are labeled by both Hoechst  
526 and SYTOX green (green) and appear as turquoise in the merged video. Data are representative  
527 of 2 independent experiments.

528

529

Figure 1

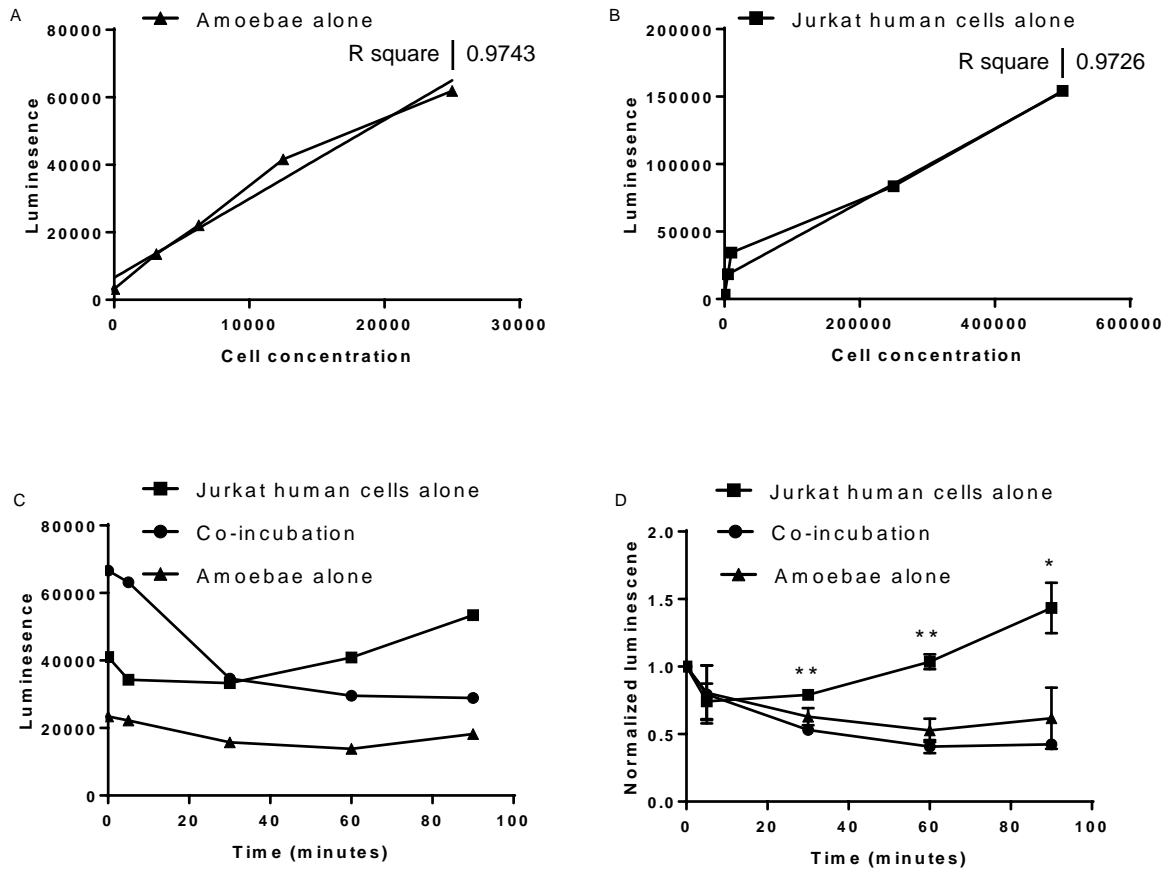

530

## Figure 2

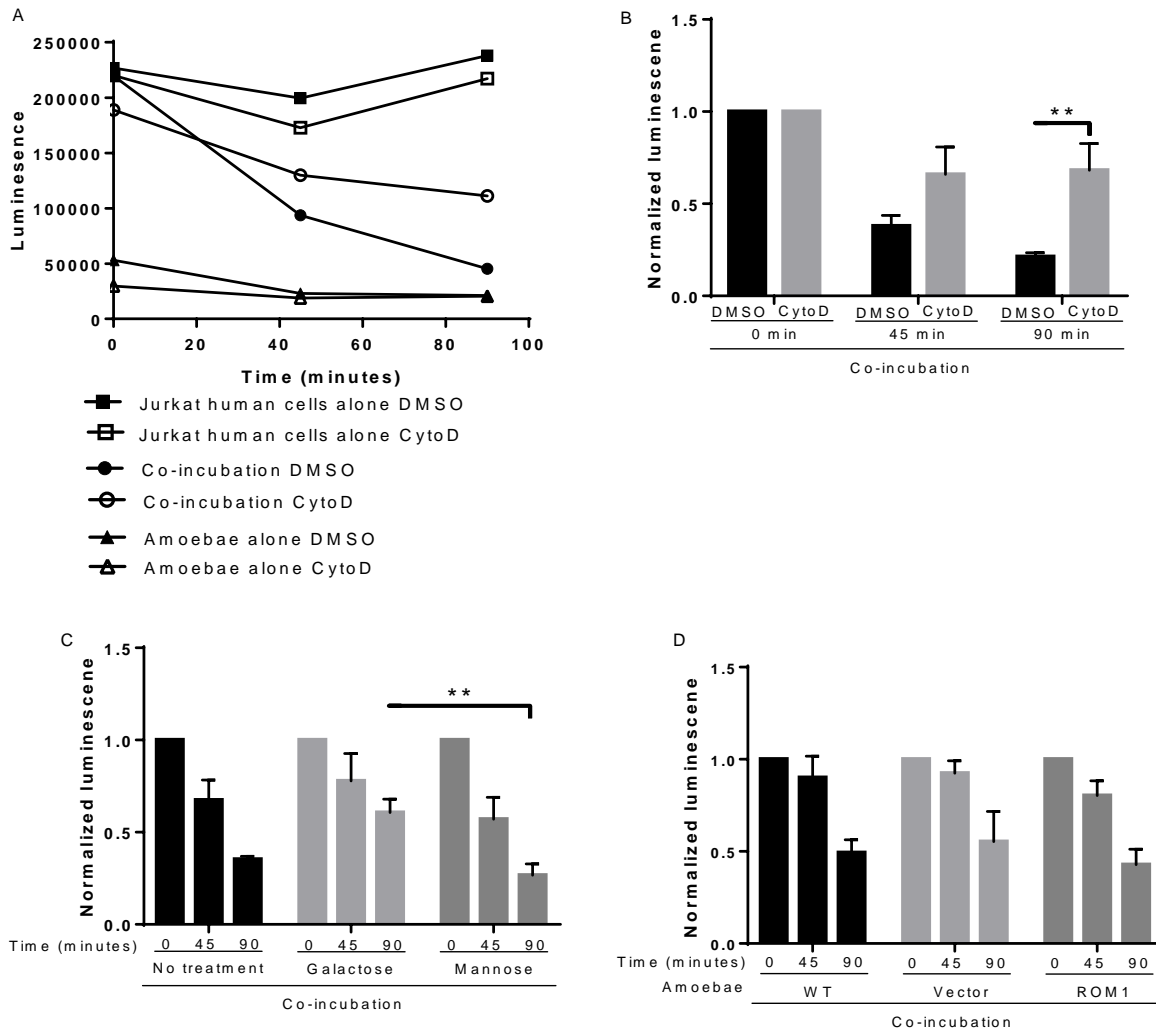

531

Figure 3

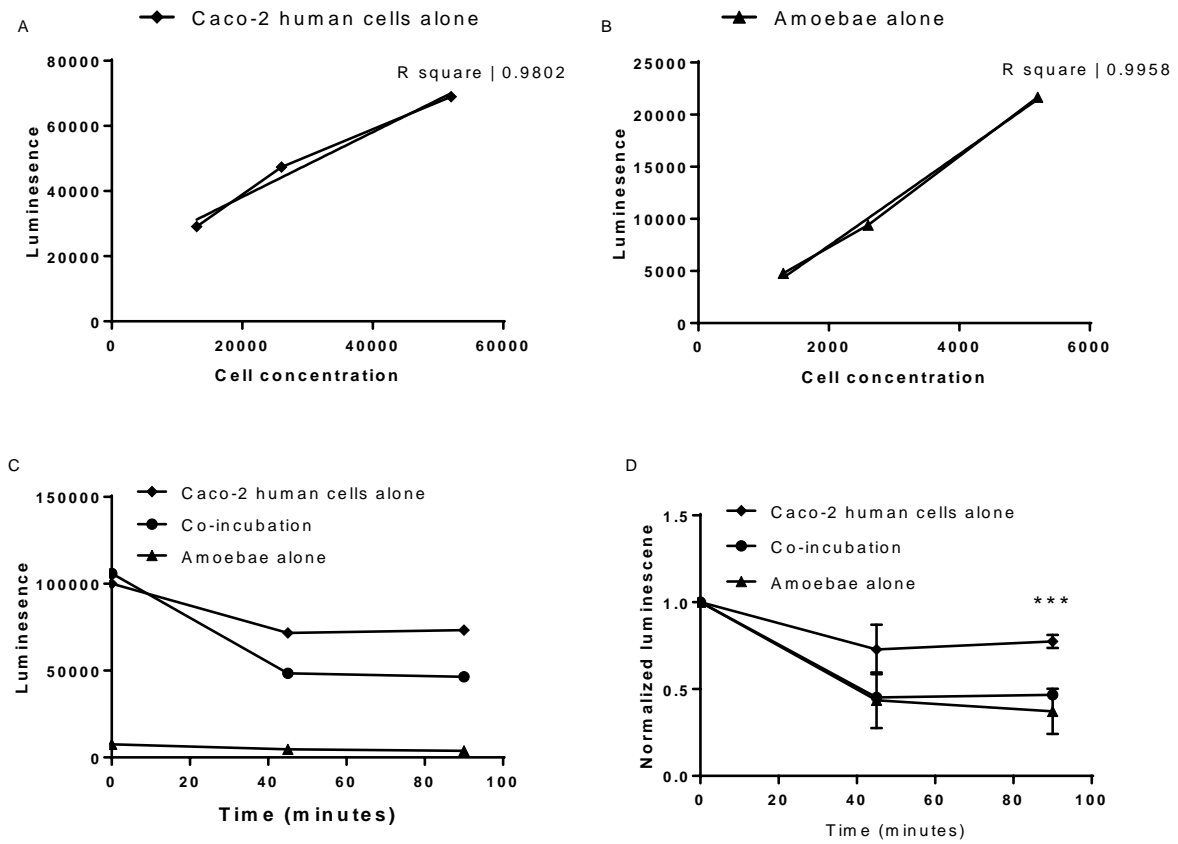

532

## Figure 4

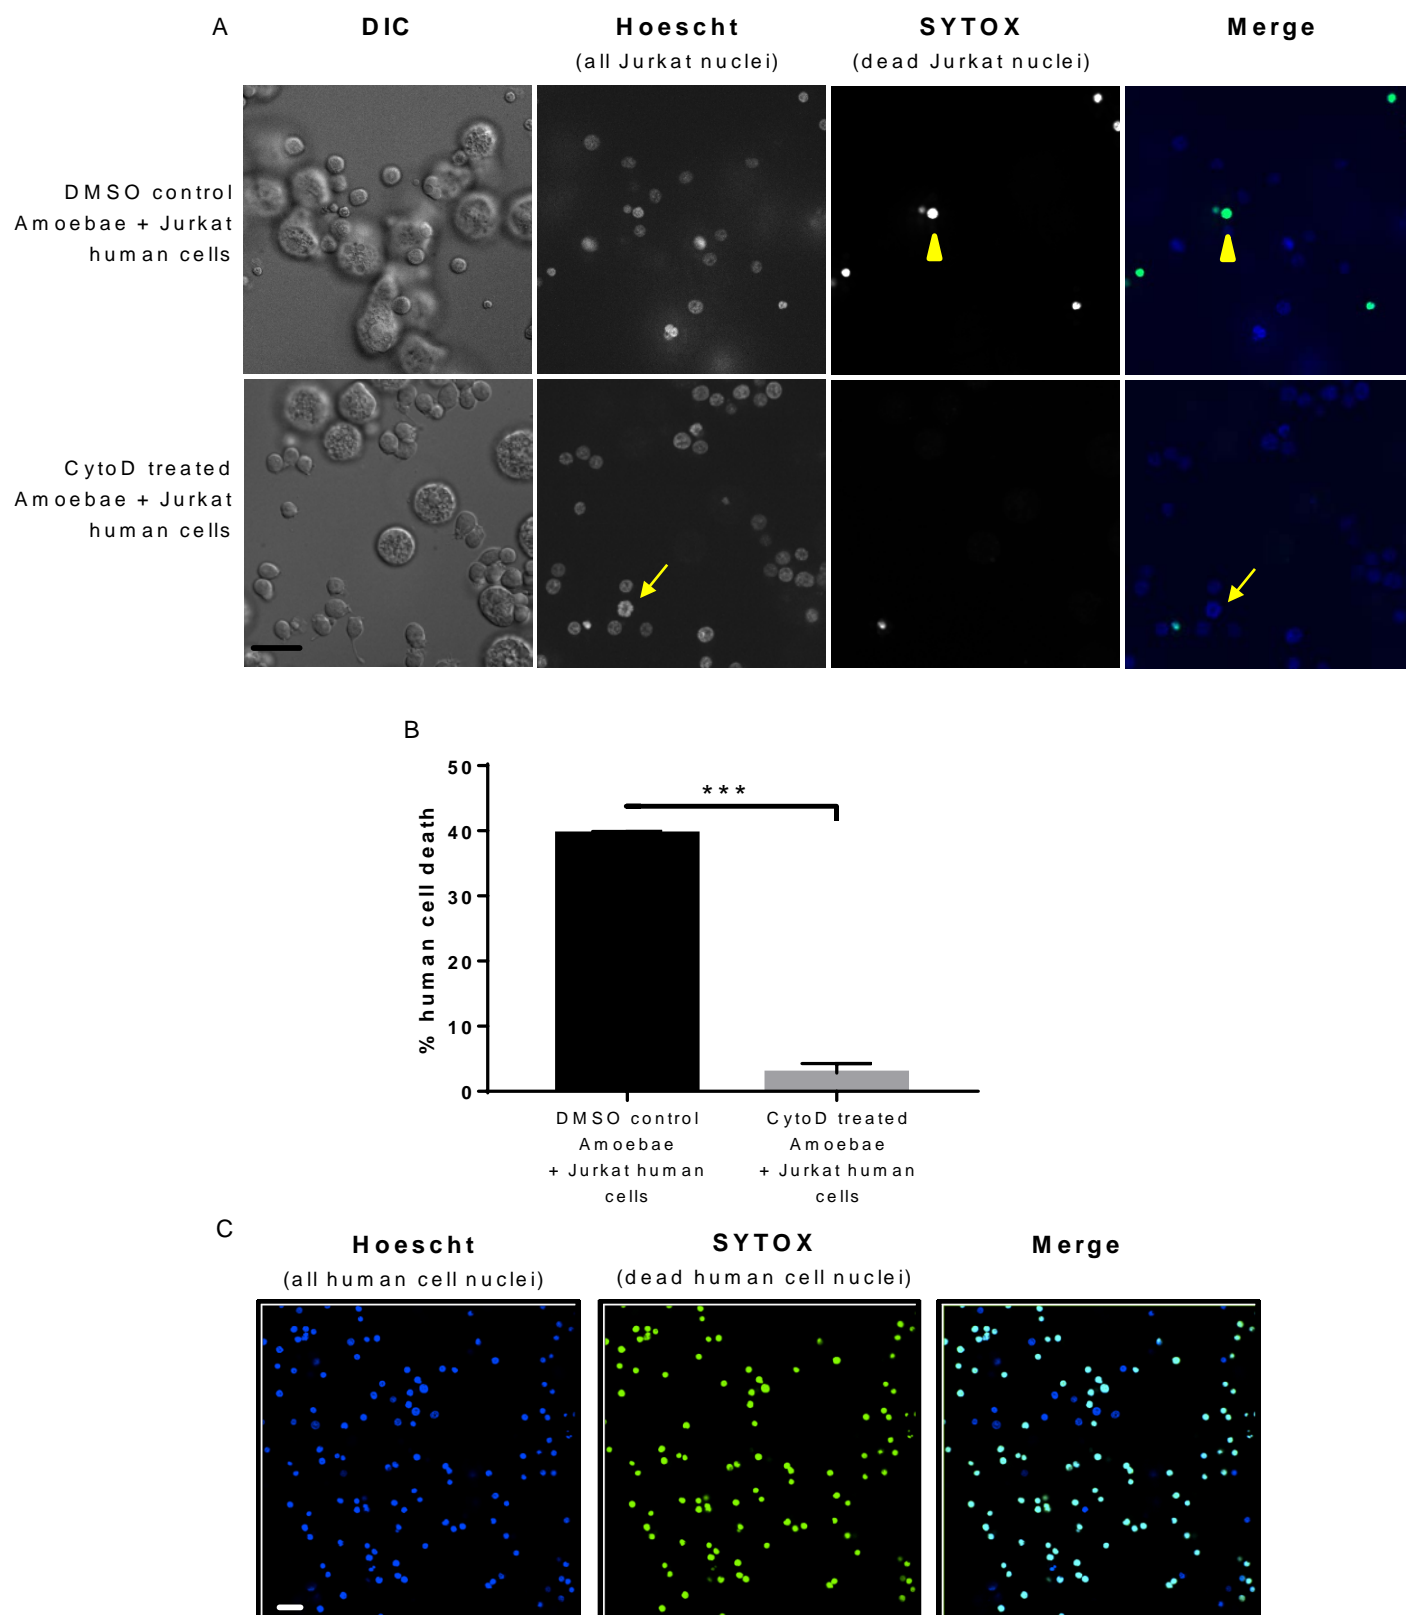



533

Figure 5

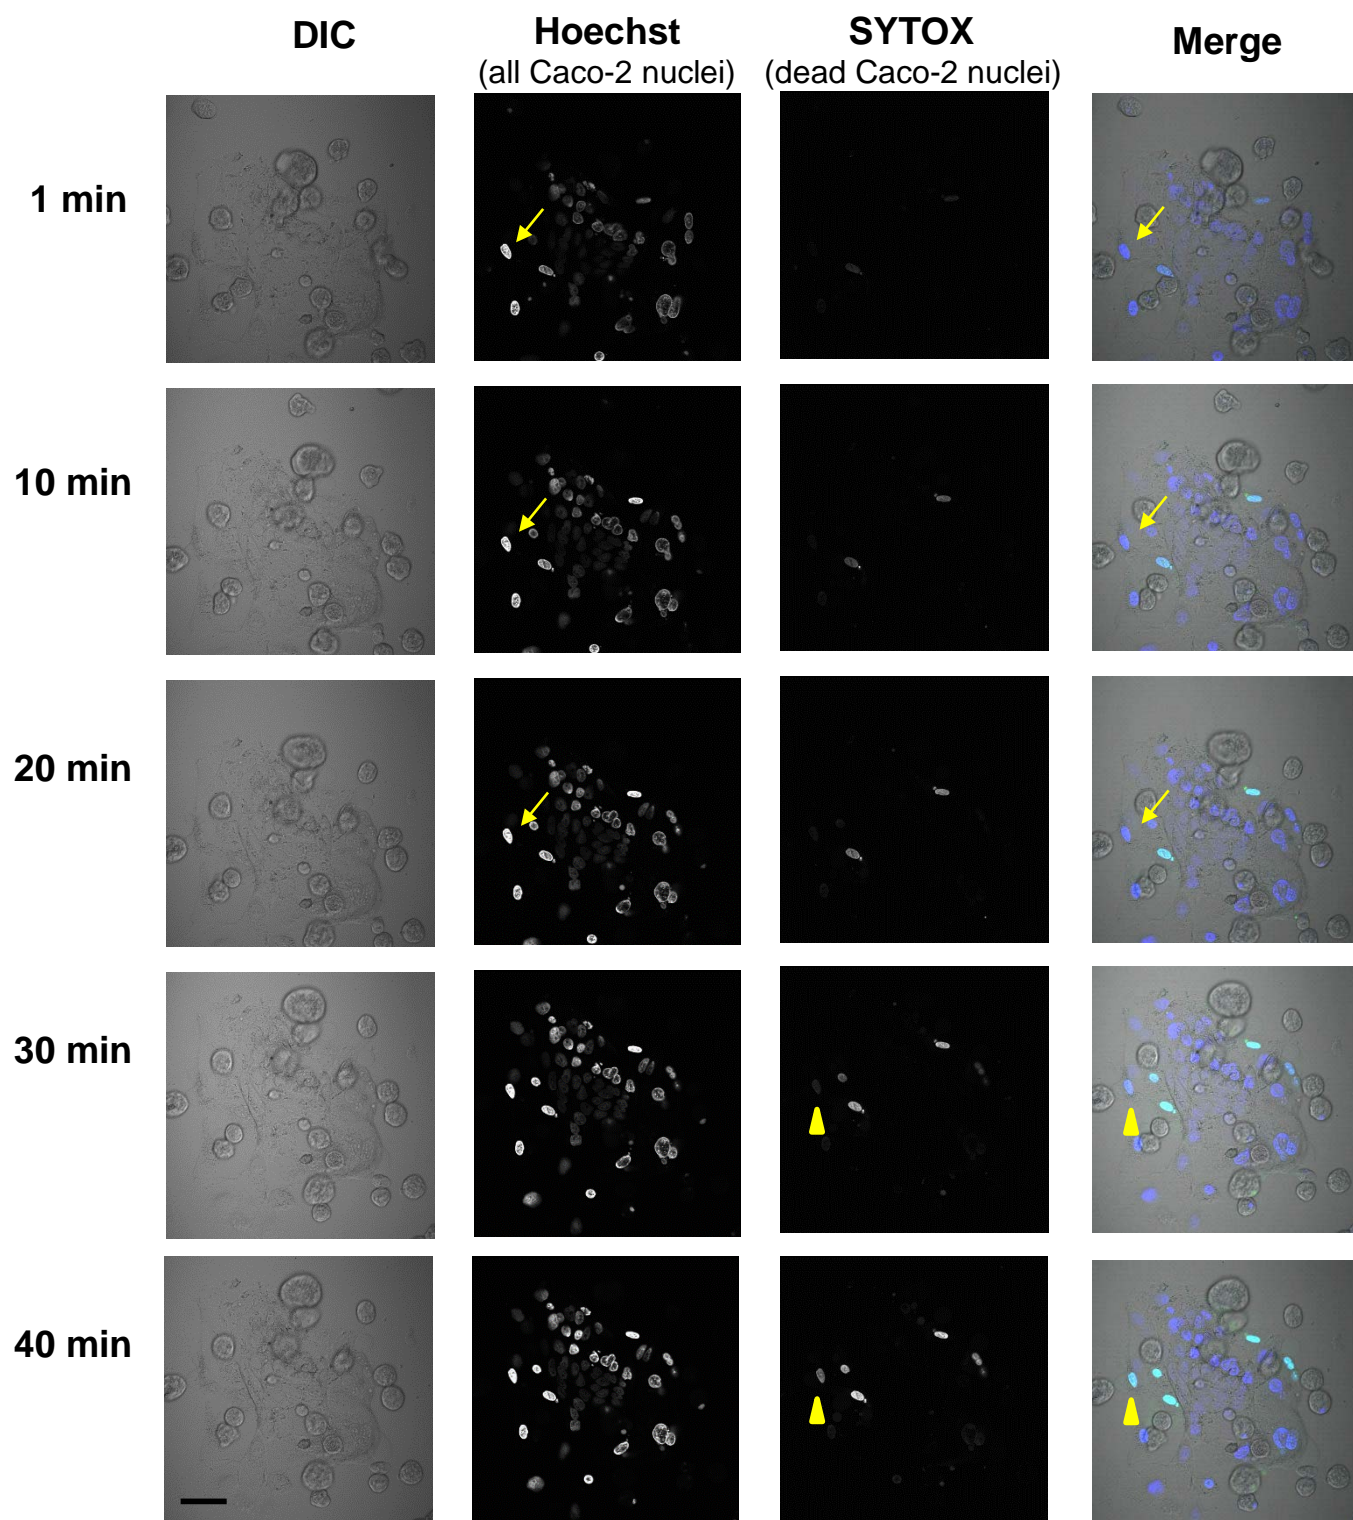

534

## Supplemental Figure 1

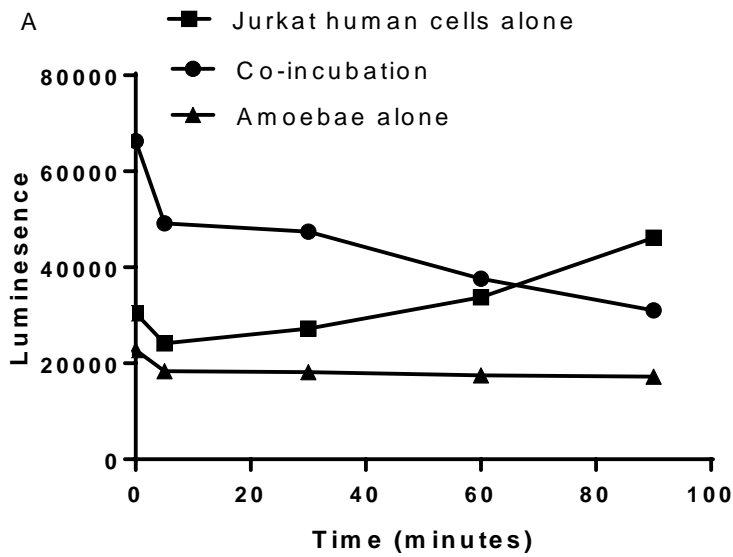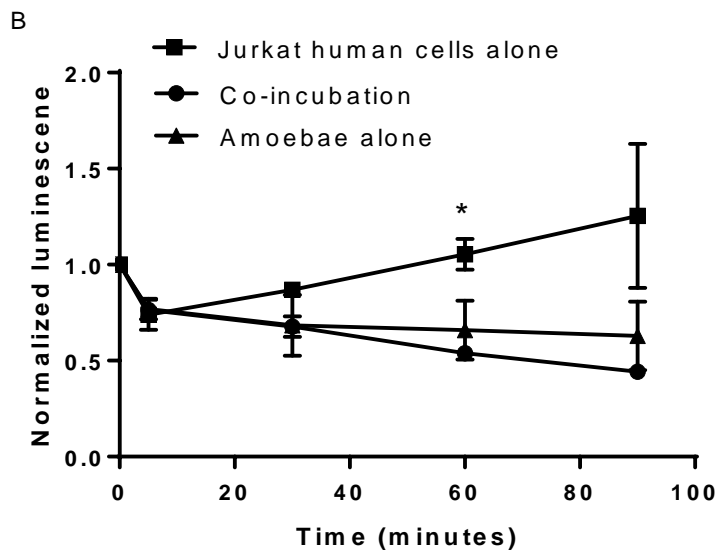

535

## Supplemental Figure 2

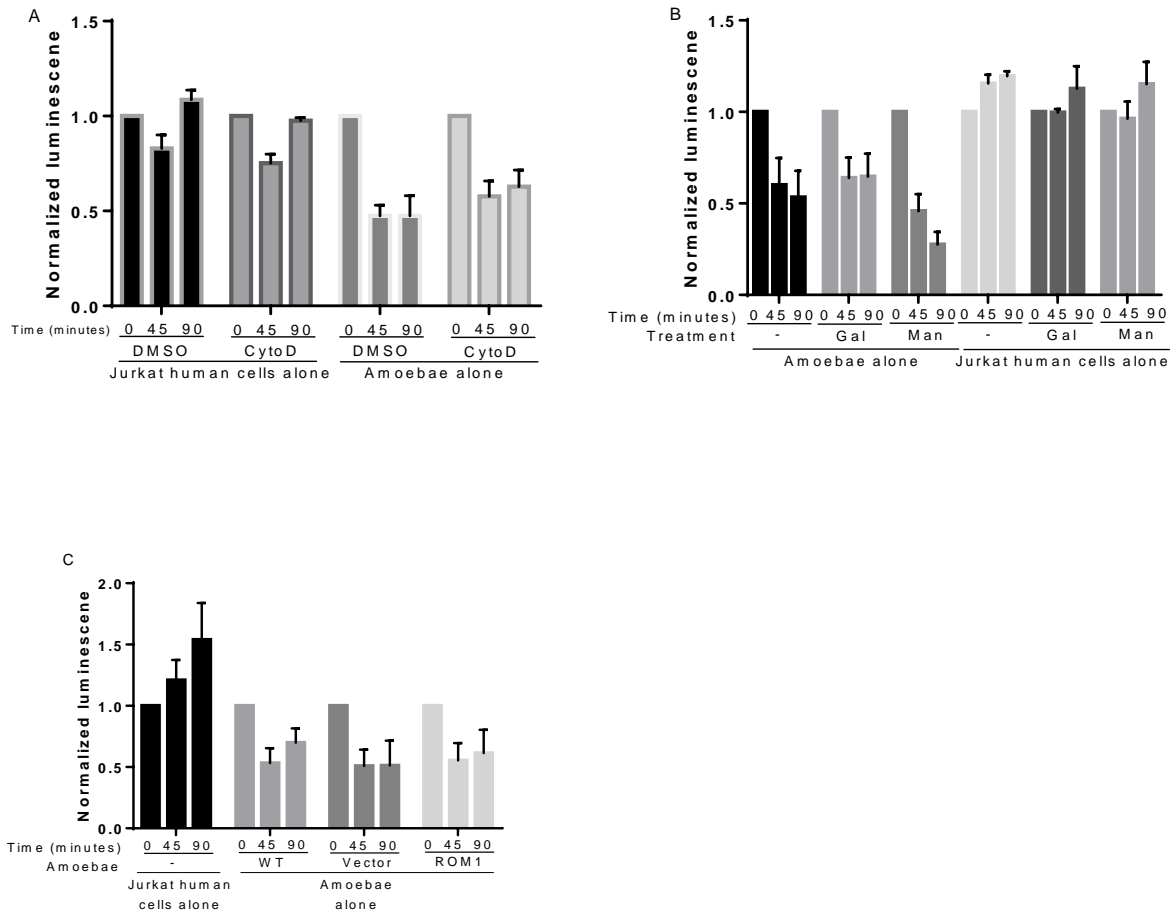

Source: https://www.biorxiv.org/content/10.1101/768069v1.full.pdf
